# Supplementary material for: p-Type β-Ga2O3 film room-temperature NH3 gas sensors with fast gas sensing and a low limit of detection
Source: Royal Society of Chemistry journal article supplement (doi:10.1039/d4tc03313b), 2024-01-01
Supplement: d4tc03313b1.pdf [file d4tc03313b1.pdf]

Supplementary information

**P-type  $\beta$ -Ga<sub>2</sub>O<sub>3</sub> films room-temperature NH<sub>3</sub> gas sensors with fast gas sensing  
and low limitation of detection**

Hongchao Zhai <sup>a</sup>, Zhengyuan Wu <sup>b,\*</sup>, Kai Xiao <sup>a</sup>, Meiyong Ge <sup>c</sup>, Chenxing Liu <sup>a</sup>, Pengfei Tian <sup>a</sup>,  
Jing Wan <sup>a</sup>, Jianlu Wang <sup>b</sup>, Junyong Kang <sup>d</sup>, Junhao Chu <sup>b</sup>, Zhilai Fang <sup>a,b,\*</sup>

<sup>a</sup> Academy for Engineering and Technology, and School of Information Science and Technology, Fudan  
University, Shanghai 200433, China

<sup>b</sup> Institute of Optoelectronics, Fudan University, Shanghai 200433, China

<sup>c</sup> National Engineering Research Center for Nanotechnology, No. 28 East Jiang Chuan Road, Shanghai 200241,  
China

<sup>d</sup> Collaborative Innovation Center for Optoelectronic Semiconductors and Efficient Devices, Department of  
Physics, Xiamen University, Xiamen 361005, China

\* E-mail address: [zlfang@fudan.edu.cn](mailto:zlfang@fudan.edu.cn), [zhengyuanwu@fudan.edu.cn](mailto:zhengyuanwu@fudan.edu.cn)

---

\* Corresponding author.

E-mail address: [zlfang@fudan.edu.cn](mailto:zlfang@fudan.edu.cn), [zhengyuanwu@fudan.edu.cn](mailto:zhengyuanwu@fudan.edu.cn)

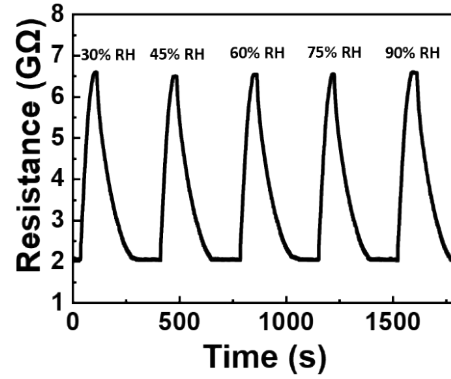

1

2 **Figure S1.** The transient response characteristics p-type N-doped  $\beta$ -Ga<sub>2</sub>O<sub>3</sub> gas sensors under 50  
3 ppm NH<sub>3</sub> with different humidity.

4

5 The transient humidity influence on NH<sub>3</sub> detection of the p-type N-doped  $\beta$ -Ga<sub>2</sub>O<sub>3</sub> gas sensors  
6 is shown in Figure S1. The NH<sub>3</sub> response slightly increases as relative humidity increases from  
7 30% to 90%. The humidity variation is only 1.07% of the NH<sub>3</sub> response, which shows low  
8 humidity effect. The p-type N-doped  $\beta$ -Ga<sub>2</sub>O<sub>3</sub> gas sensor is stable over a large humidity range.

9

1

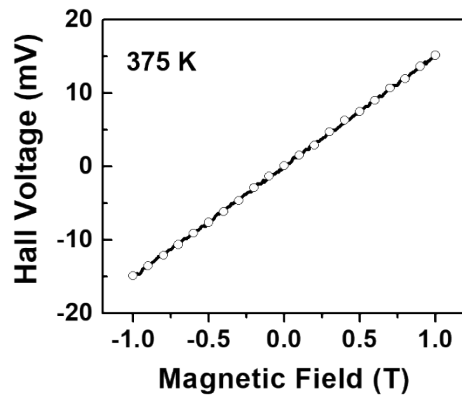

2

3 **Figure S2.** Hall voltage versus applied magnetic field for the N-doped  $\beta$ - $\text{Ga}_2\text{O}_3$  films at 375 K.

4

5 Figure S2 shows the magnetic-field-dependent Hall measurement conducted on N-doped  $\beta$ -  
6  $\text{Ga}_2\text{O}_3$  films at 375 K with a positive Hall coefficient. The Hall hole concentration is  $4.15 \times 10^{15}$   
7  $\text{cm}^{-3}$ .

8

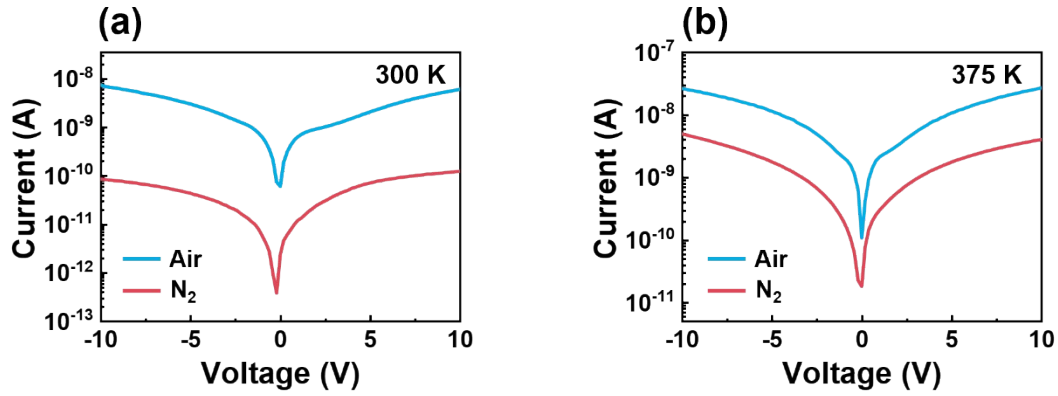

1

2 **Figure S3.** The  $I$ - $V$  characteristics of the p-type  $\beta$ - $\text{Ga}_2\text{O}_3$  MSM sensors in dry air and  $\text{N}_2$  (a) at  
 3 300 K and (b) 375 K.

4

5 The width of the HAL can be extracted from the  $I$ - $V$  characteristics of p-type  $\beta$ - $\text{Ga}_2\text{O}_3$  MSM  
 6 sensors in dry air and in the  $\text{N}_2$  gas atmosphere (Figure S3) by equation:

$$7 \quad \sigma_g = \sigma_a \times \exp(-e\Delta V_{sur}/kT)$$

$$8 \quad \Delta x_{sur} = (2\varepsilon\Delta V_{sur}/eN_A)$$

9 The width of HAL in dry air at 10 V bias is calculated to be 44.5 nm at 300 K ( $x_{sur}$ ,  $W_{HAL}$ ),  
 10 and decreases to 19.7 nm at 375 K, which is suitable for RT gas sensing involving multi-carriers  
 11 chemisorbed reactions
